# Supplementary material
Source: publisher site journal article supplement (https://www.dovepress.com/article/260069)
Supplement: Supplementary file 1 [file get_supplementary_file.php]

**Supplementary Materials**

**A pH-Responsive System Based on Fluorescence Enhanced Gold Nanoparticle for Renal Targeting Drug Delivery and Fibrosis Therapy**

Xuandi Lai1

Xinran Geng2

Lishan Tan1

Jianqiang Hu2

Shubin Wang1

1Department of Oncology, Shenzhen Key Laboratory of Gastrointestinal Cancer Translational Research, Peking University Shenzhen Hospital, Shenzhen Peking University-The Hong Kong University of Science and Technology Medical Center, Shenzhen 518036. People’s Republic of China; 2Department of Chemistry, School of Chemistry and Chemical Engineering, South China University of Technology, Guangzhou 510640. People’s Republic of China

**Table S1** Primers used for quantitative Real-time PCR

| Name | Forward | Reverse |
| --- | --- | --- |
| GAPDH | GGTGAAGGTCGGTGTGAACG | CTCGCTCCTGGAAGATGGTG |
| Collagen-I | ATCTCCTGGTGCTGATGGAC | ACCTTGTTTGCCAGGTTCAC |
| Fibronectin | CGAGGTGACAGAGACCACAA | CTGGAGTCAAGCCAGACACA |
| TNF-α | ATGAGCACAGAAAGCATGATC | TACAGGCTTGTCACTCGAATT |
| MCP-1 | GCATCCACGTGTTGGCTCA | CTCCAGCCTACTCATTGGGATCA |
| ICAM-1 | TGCGTTTTGGAGCTAGCGGACCA | CGAGGACCATACAGCACGTGCAG |
| IL-6 | CATTGGGAAATTGGGGTAGGAAG | CATTGGGAAATTGGGGTAGGAAG |


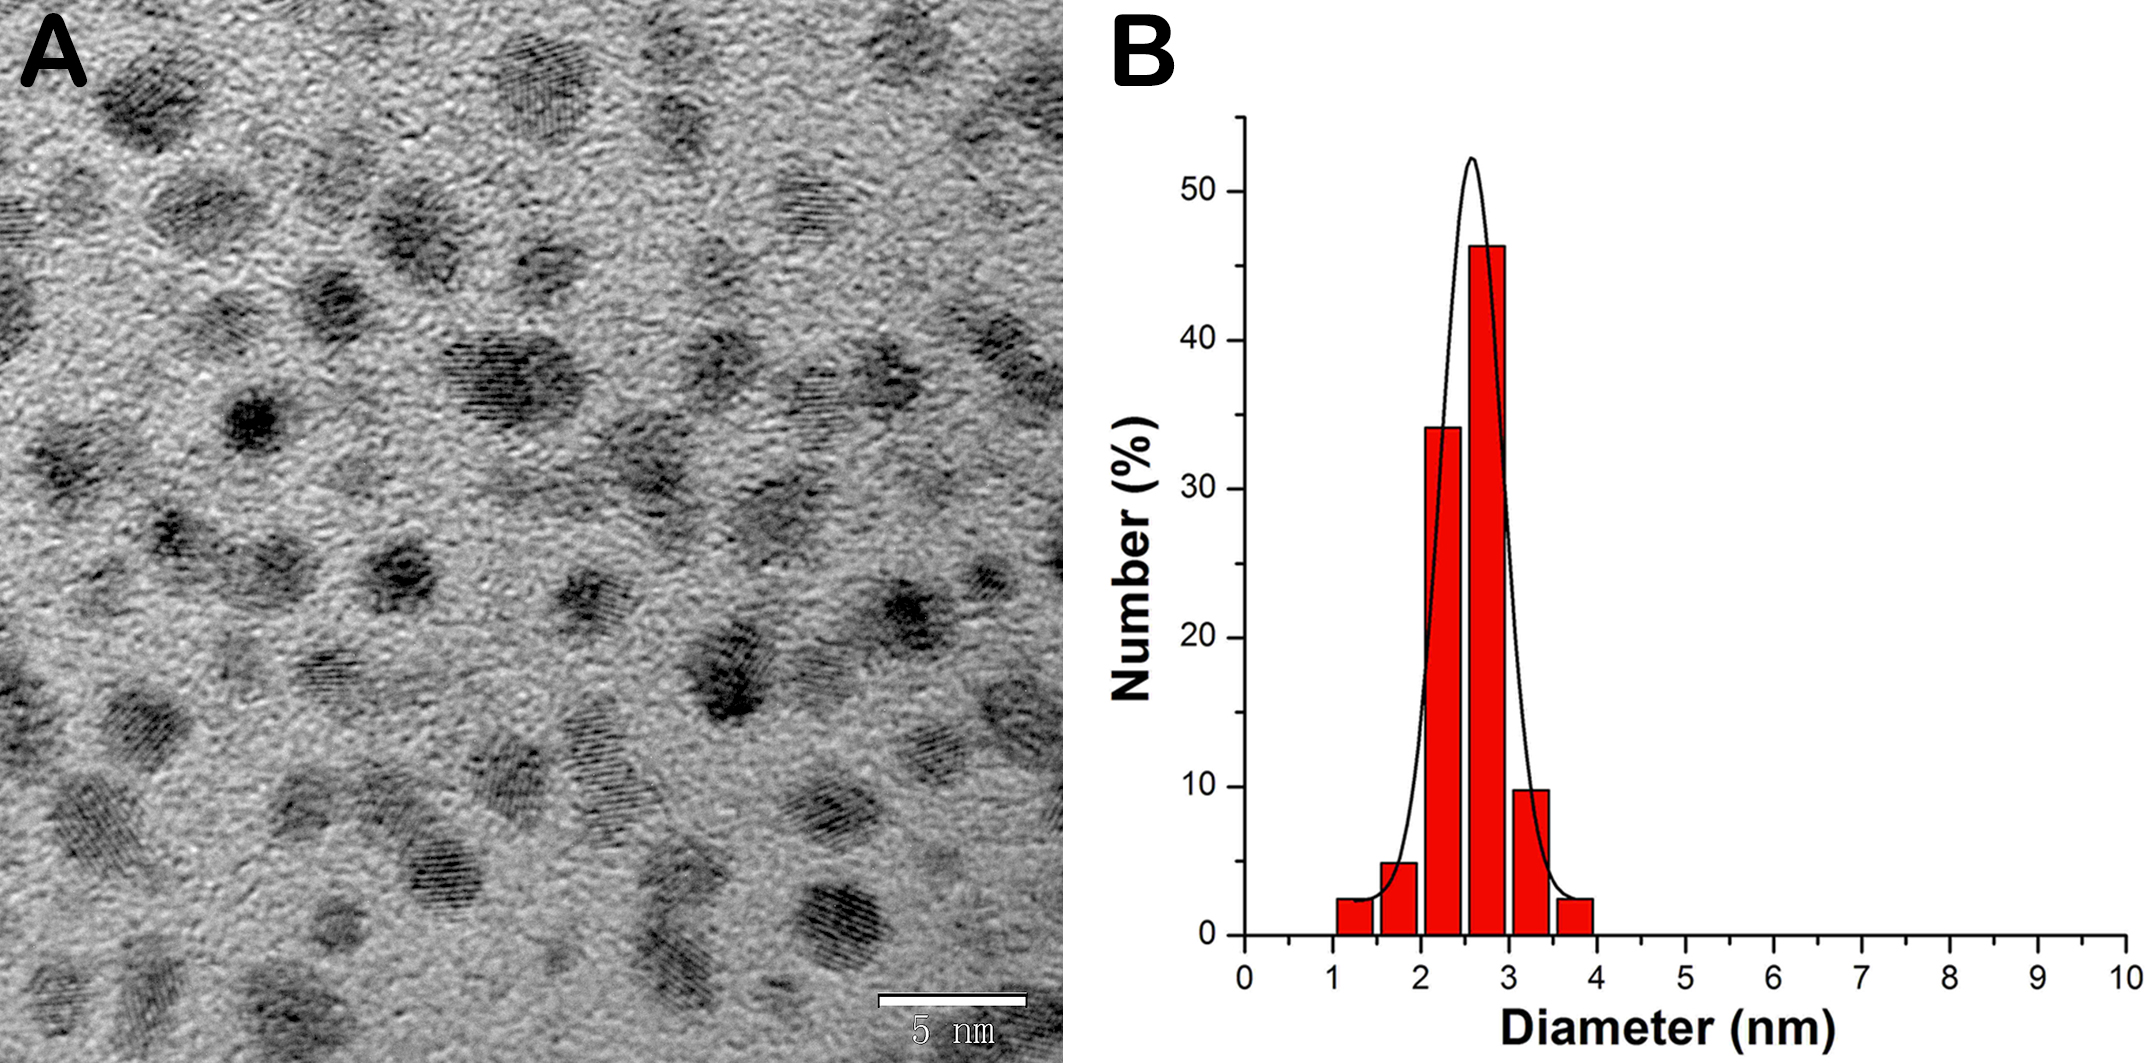


**Figure S1** (**A**)TEM image and (**B**) hydrodynamic size distribution of AuLA.


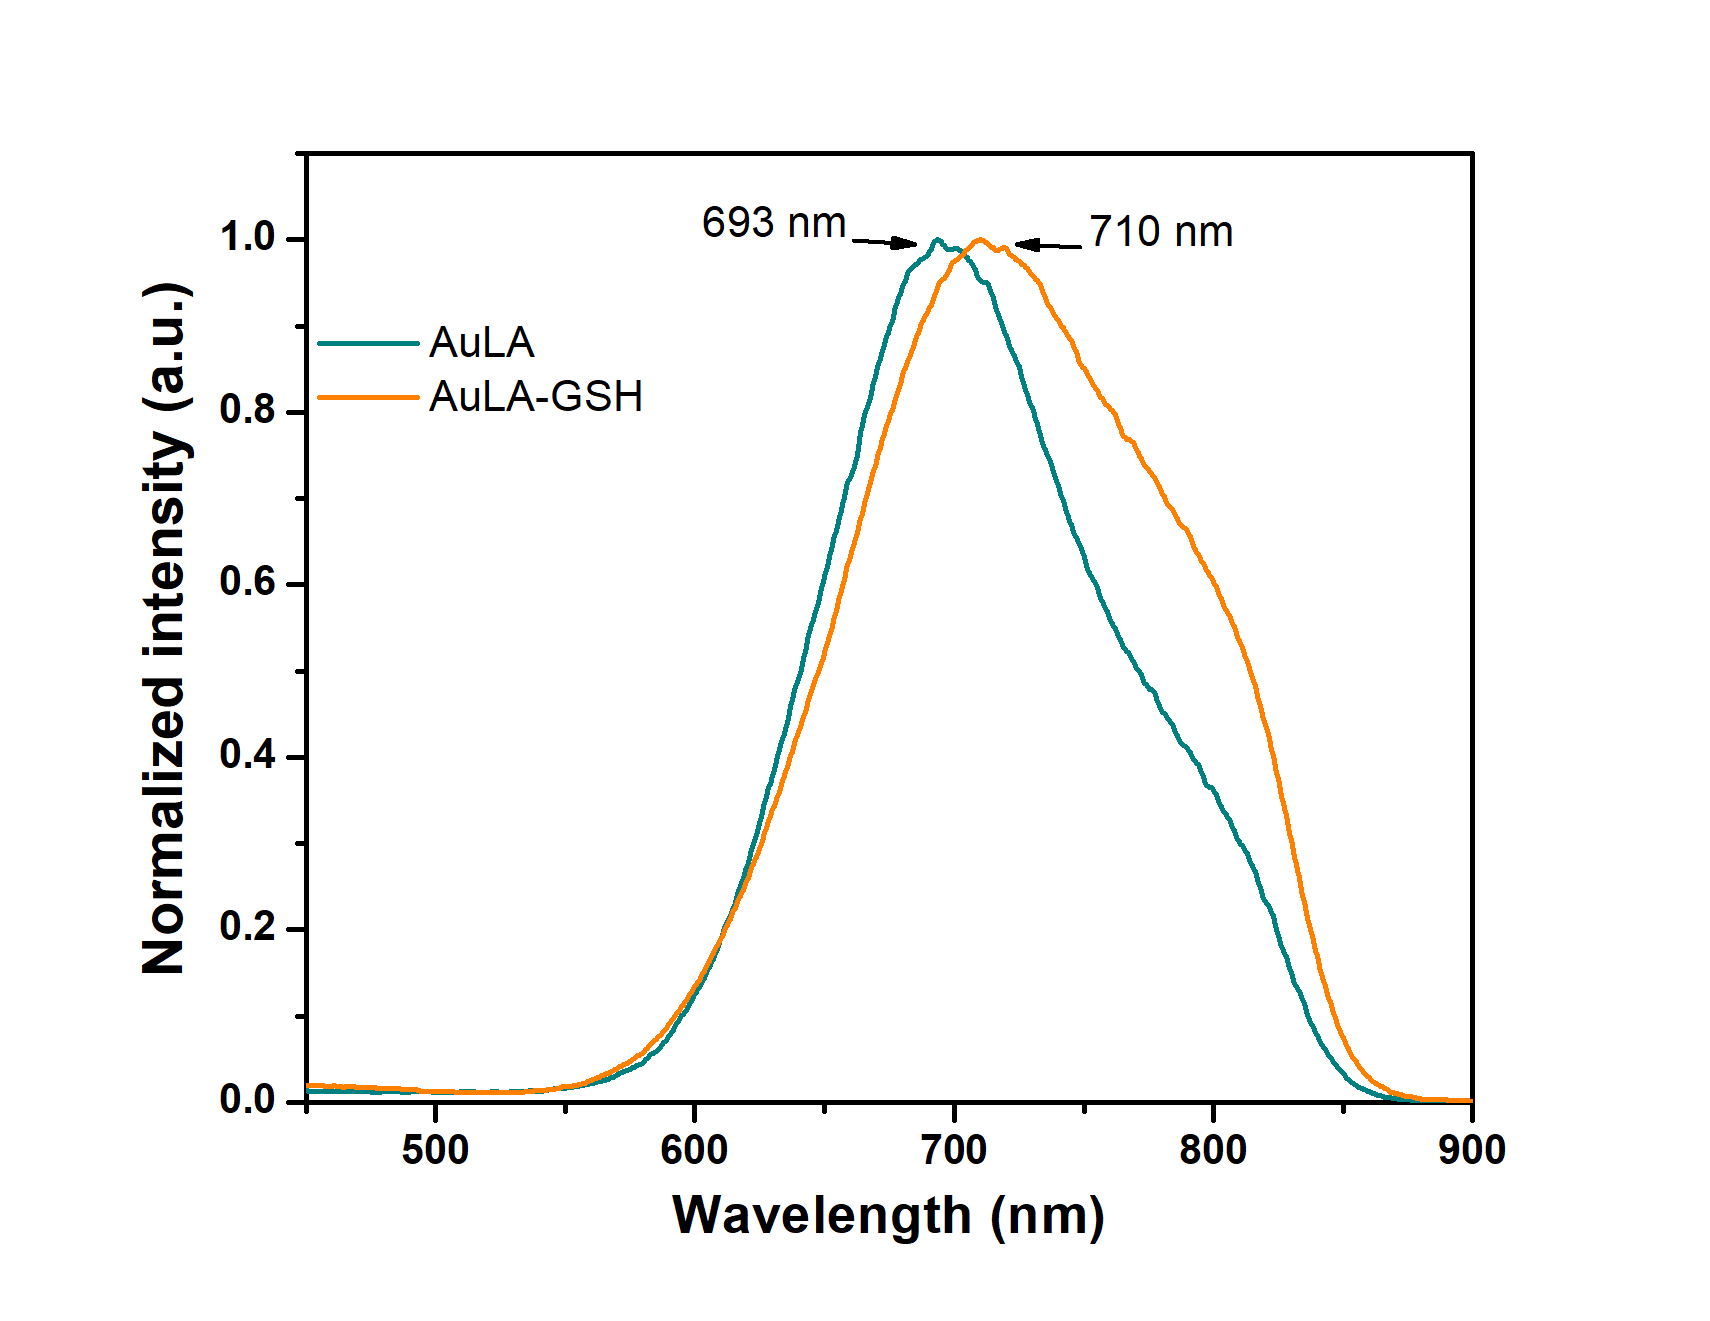


**Figure S2** Fluorescence emission spectra of AuLA and AuLA-GSH.


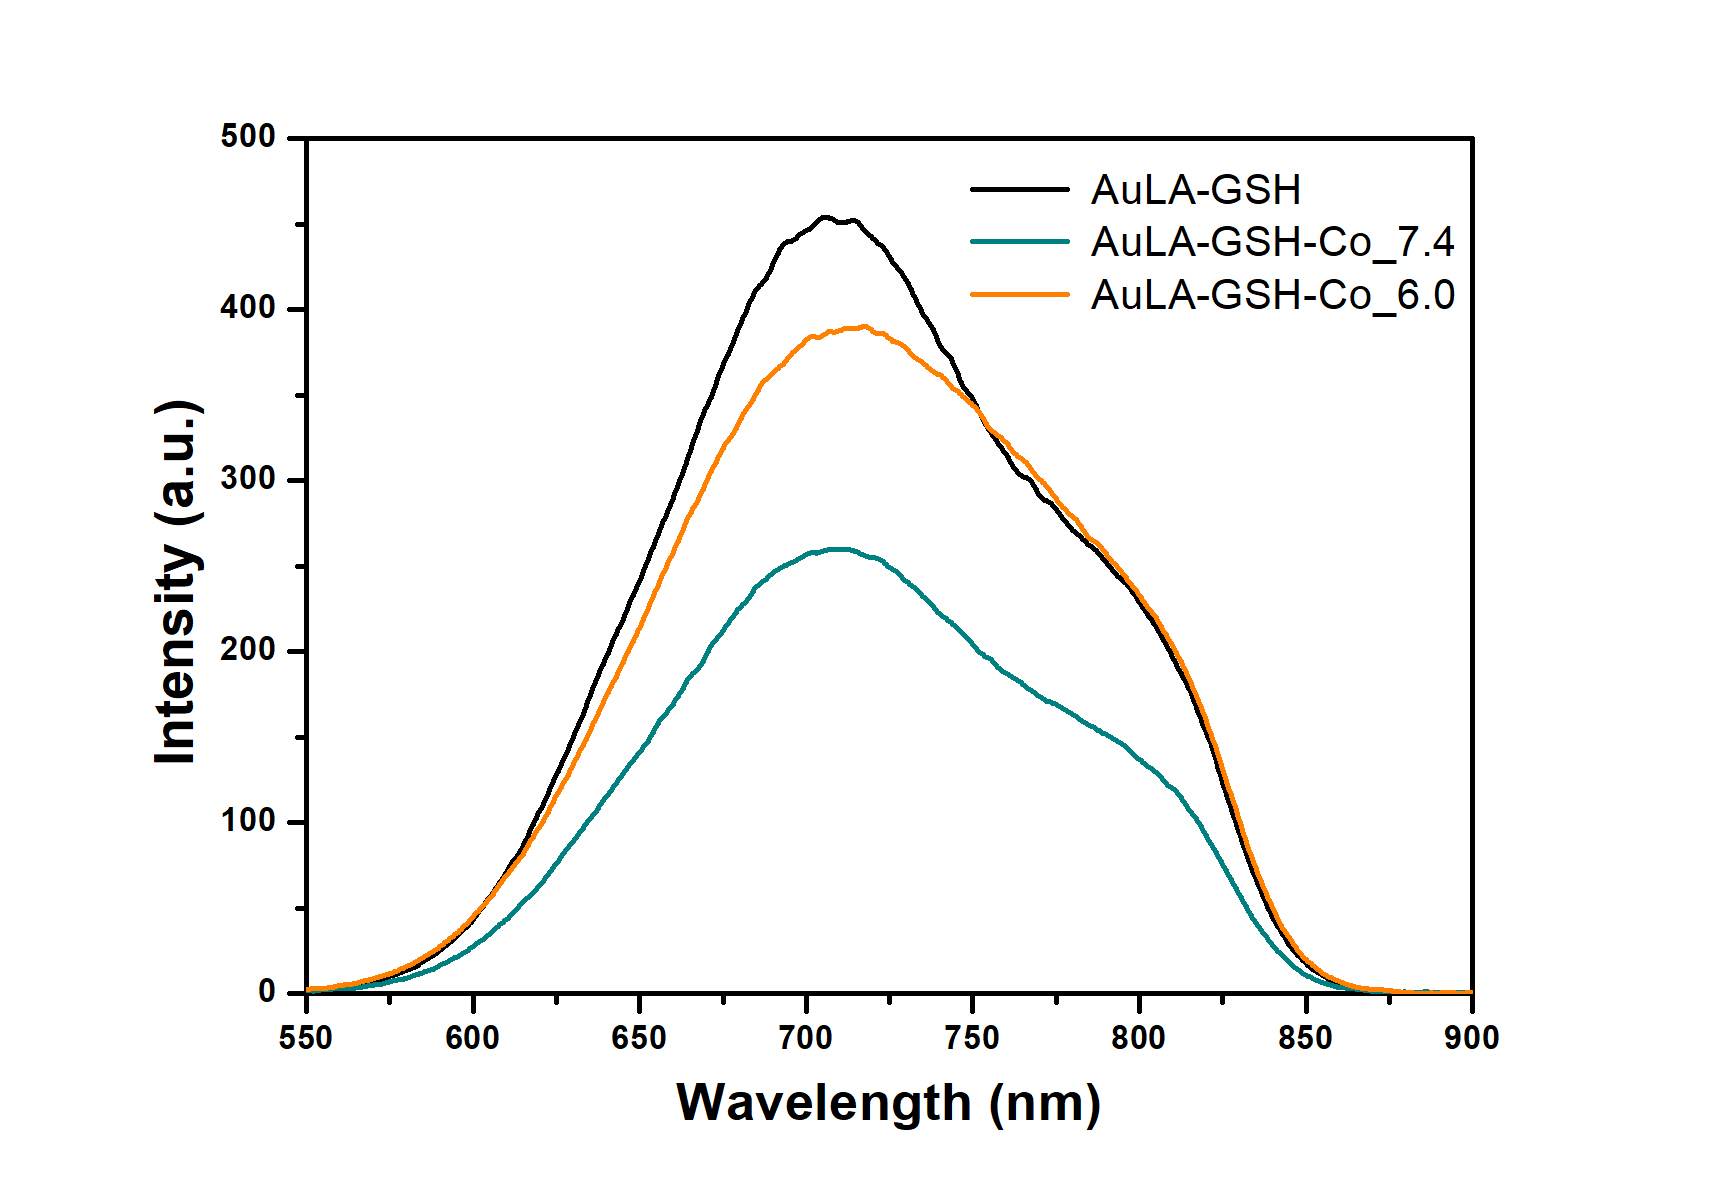


**Figure S3** Fluorescence emission spectra of AuLA-GSH and AuLA-GSH-Co in pH7.4 (AuLA-GSH-Co_7.4) or in pH6.0 (AuLA-GSH-Co_6.0) condition.


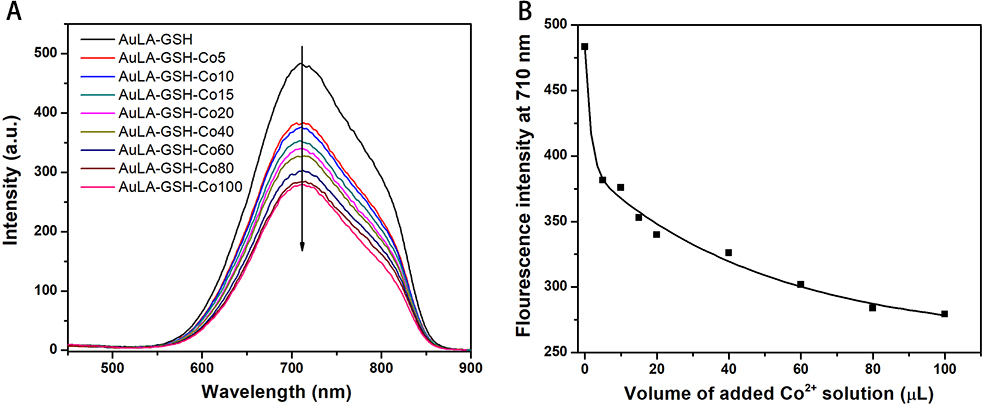


**Figure S4** (**A**) Fluorescence emission spectra of AuLA-GSH-Co*x*, *x* represents the adding volume (µL) of 10 mM CoCl2 and (**B**) corresponding fluorescence emission intensity at 700 nm.


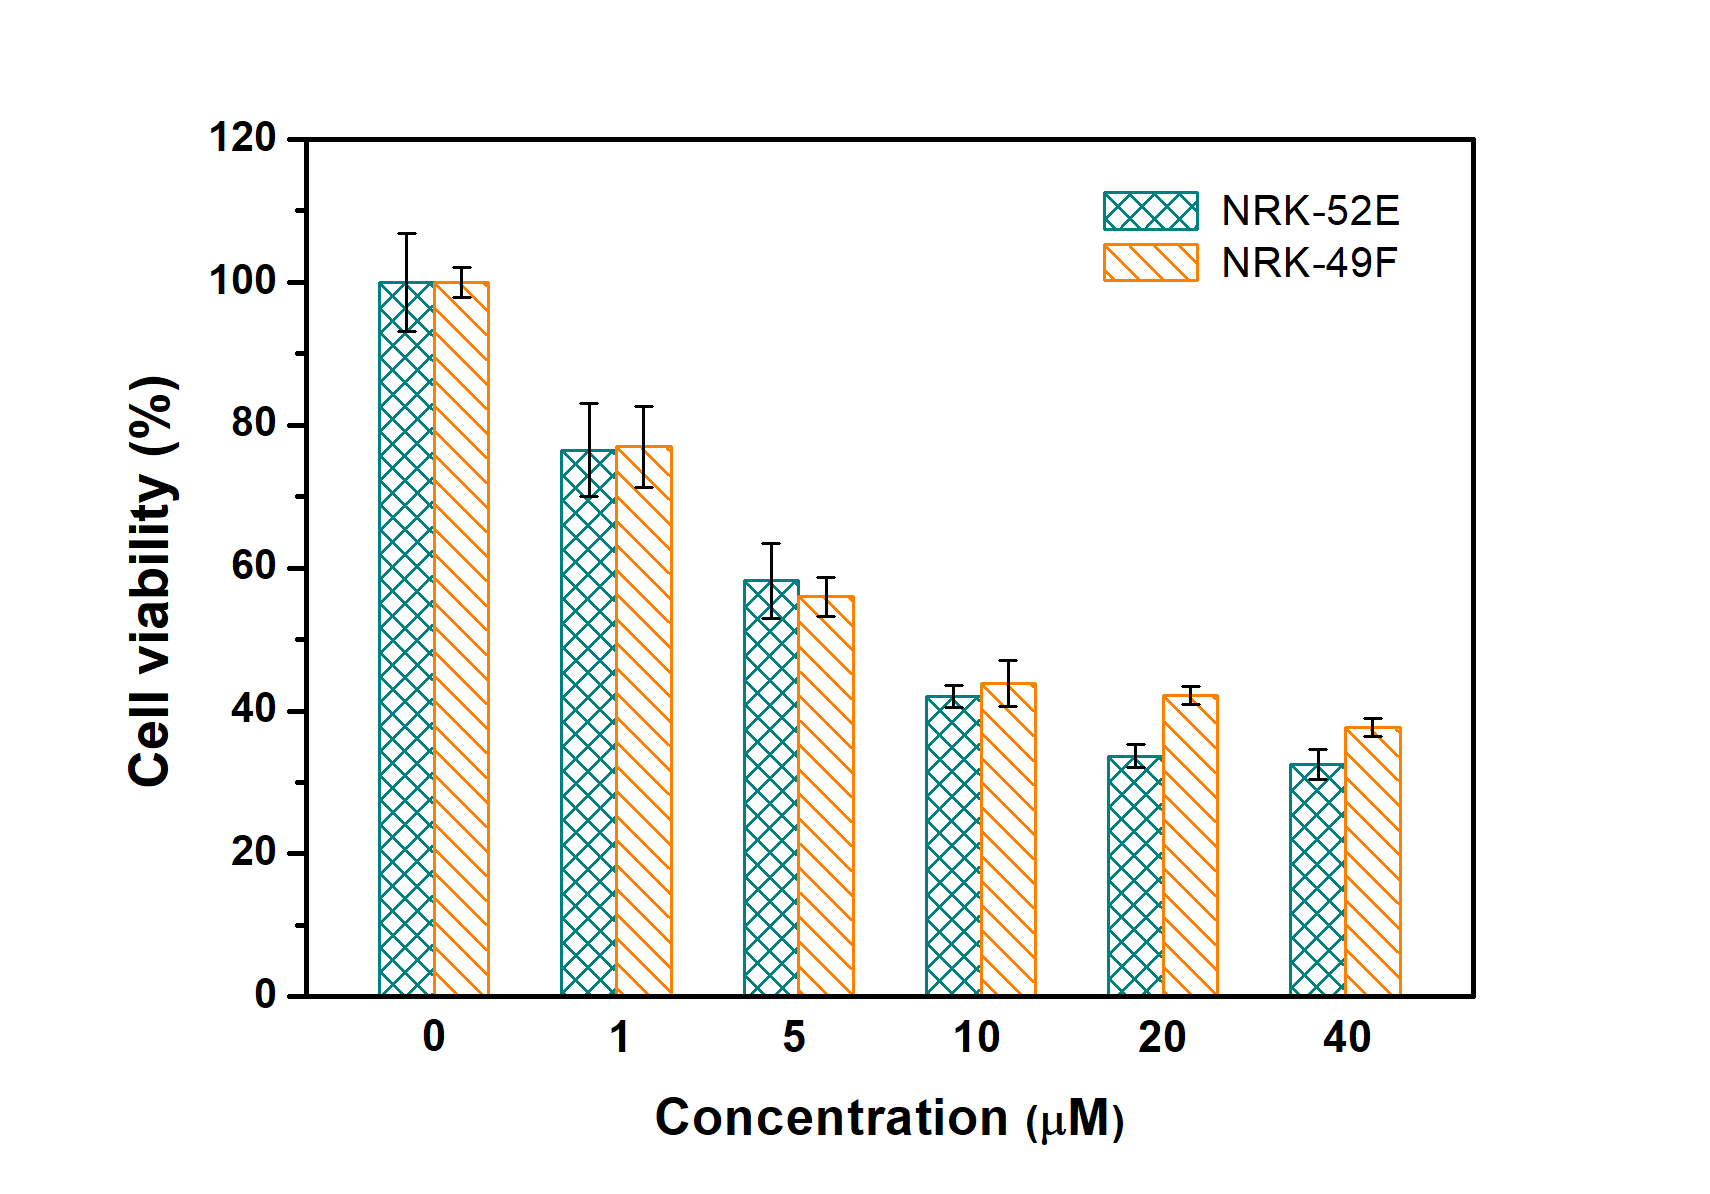


**Figure S5** Cell viability of NRK-52E and NRK-49F incubated with CoCl2 in different concentration for 24 h. **1**: Image of a whole cell; **2**: enlarge vision of image 1; **3**: enlarge vision of image 2.


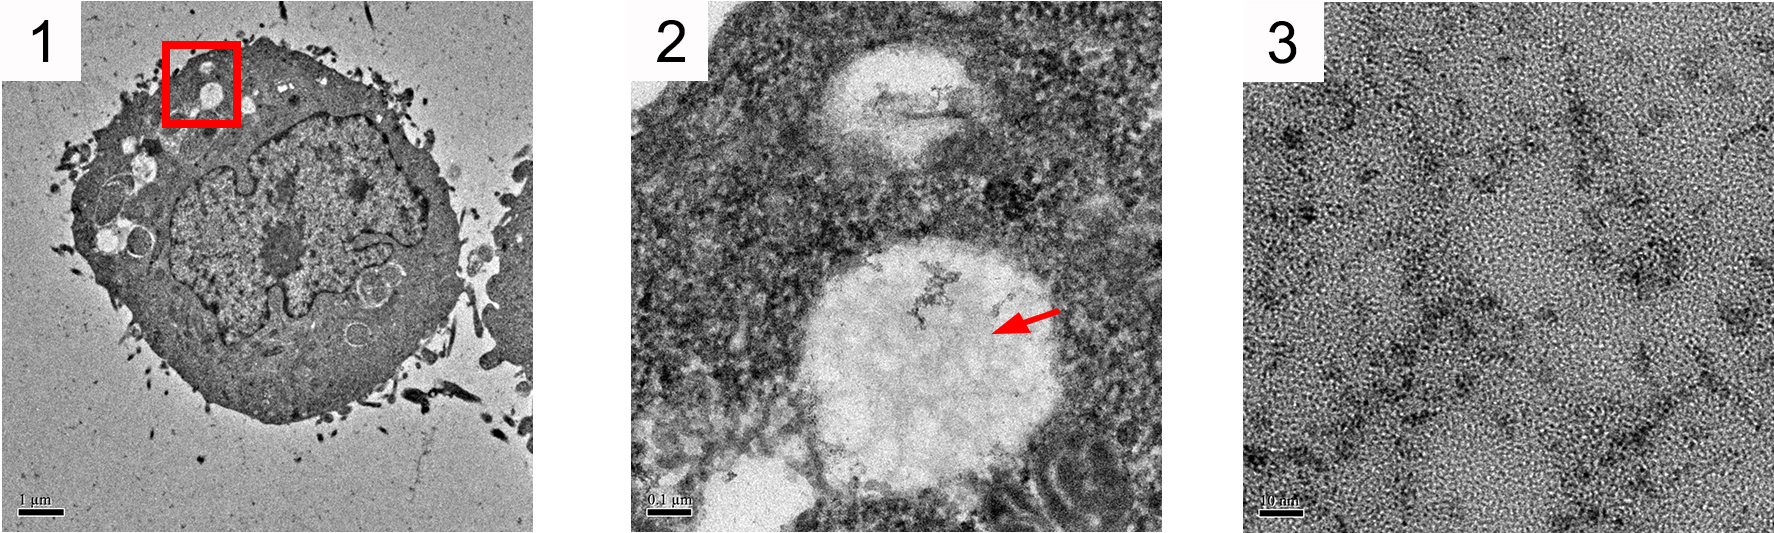


**Figure S6** Cell slice TEM images of NRK-52E incubated with AuLA-GSH for 1 h. **1**: Image of a whole cell; **2**: enlarge vision of image 1; **3**: enlarge vision of image 2.


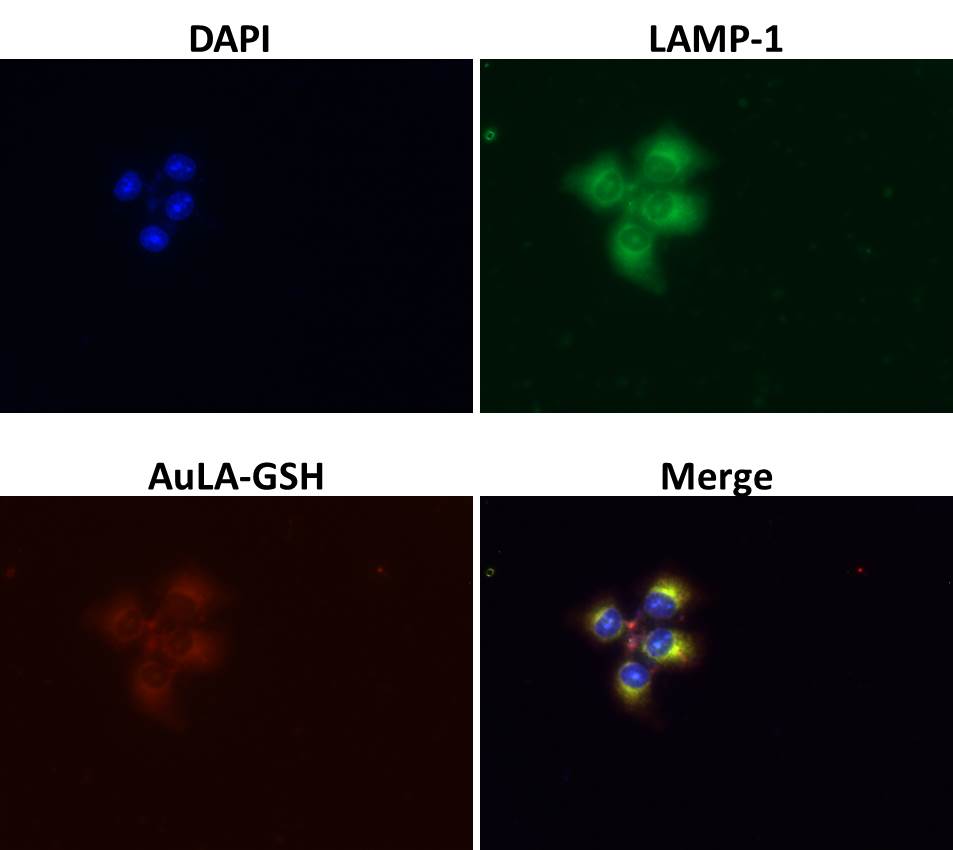


**Figure S7** Three-color colocalization images of NRK-52E cells incubated with AuLA-GSH for 1 h.


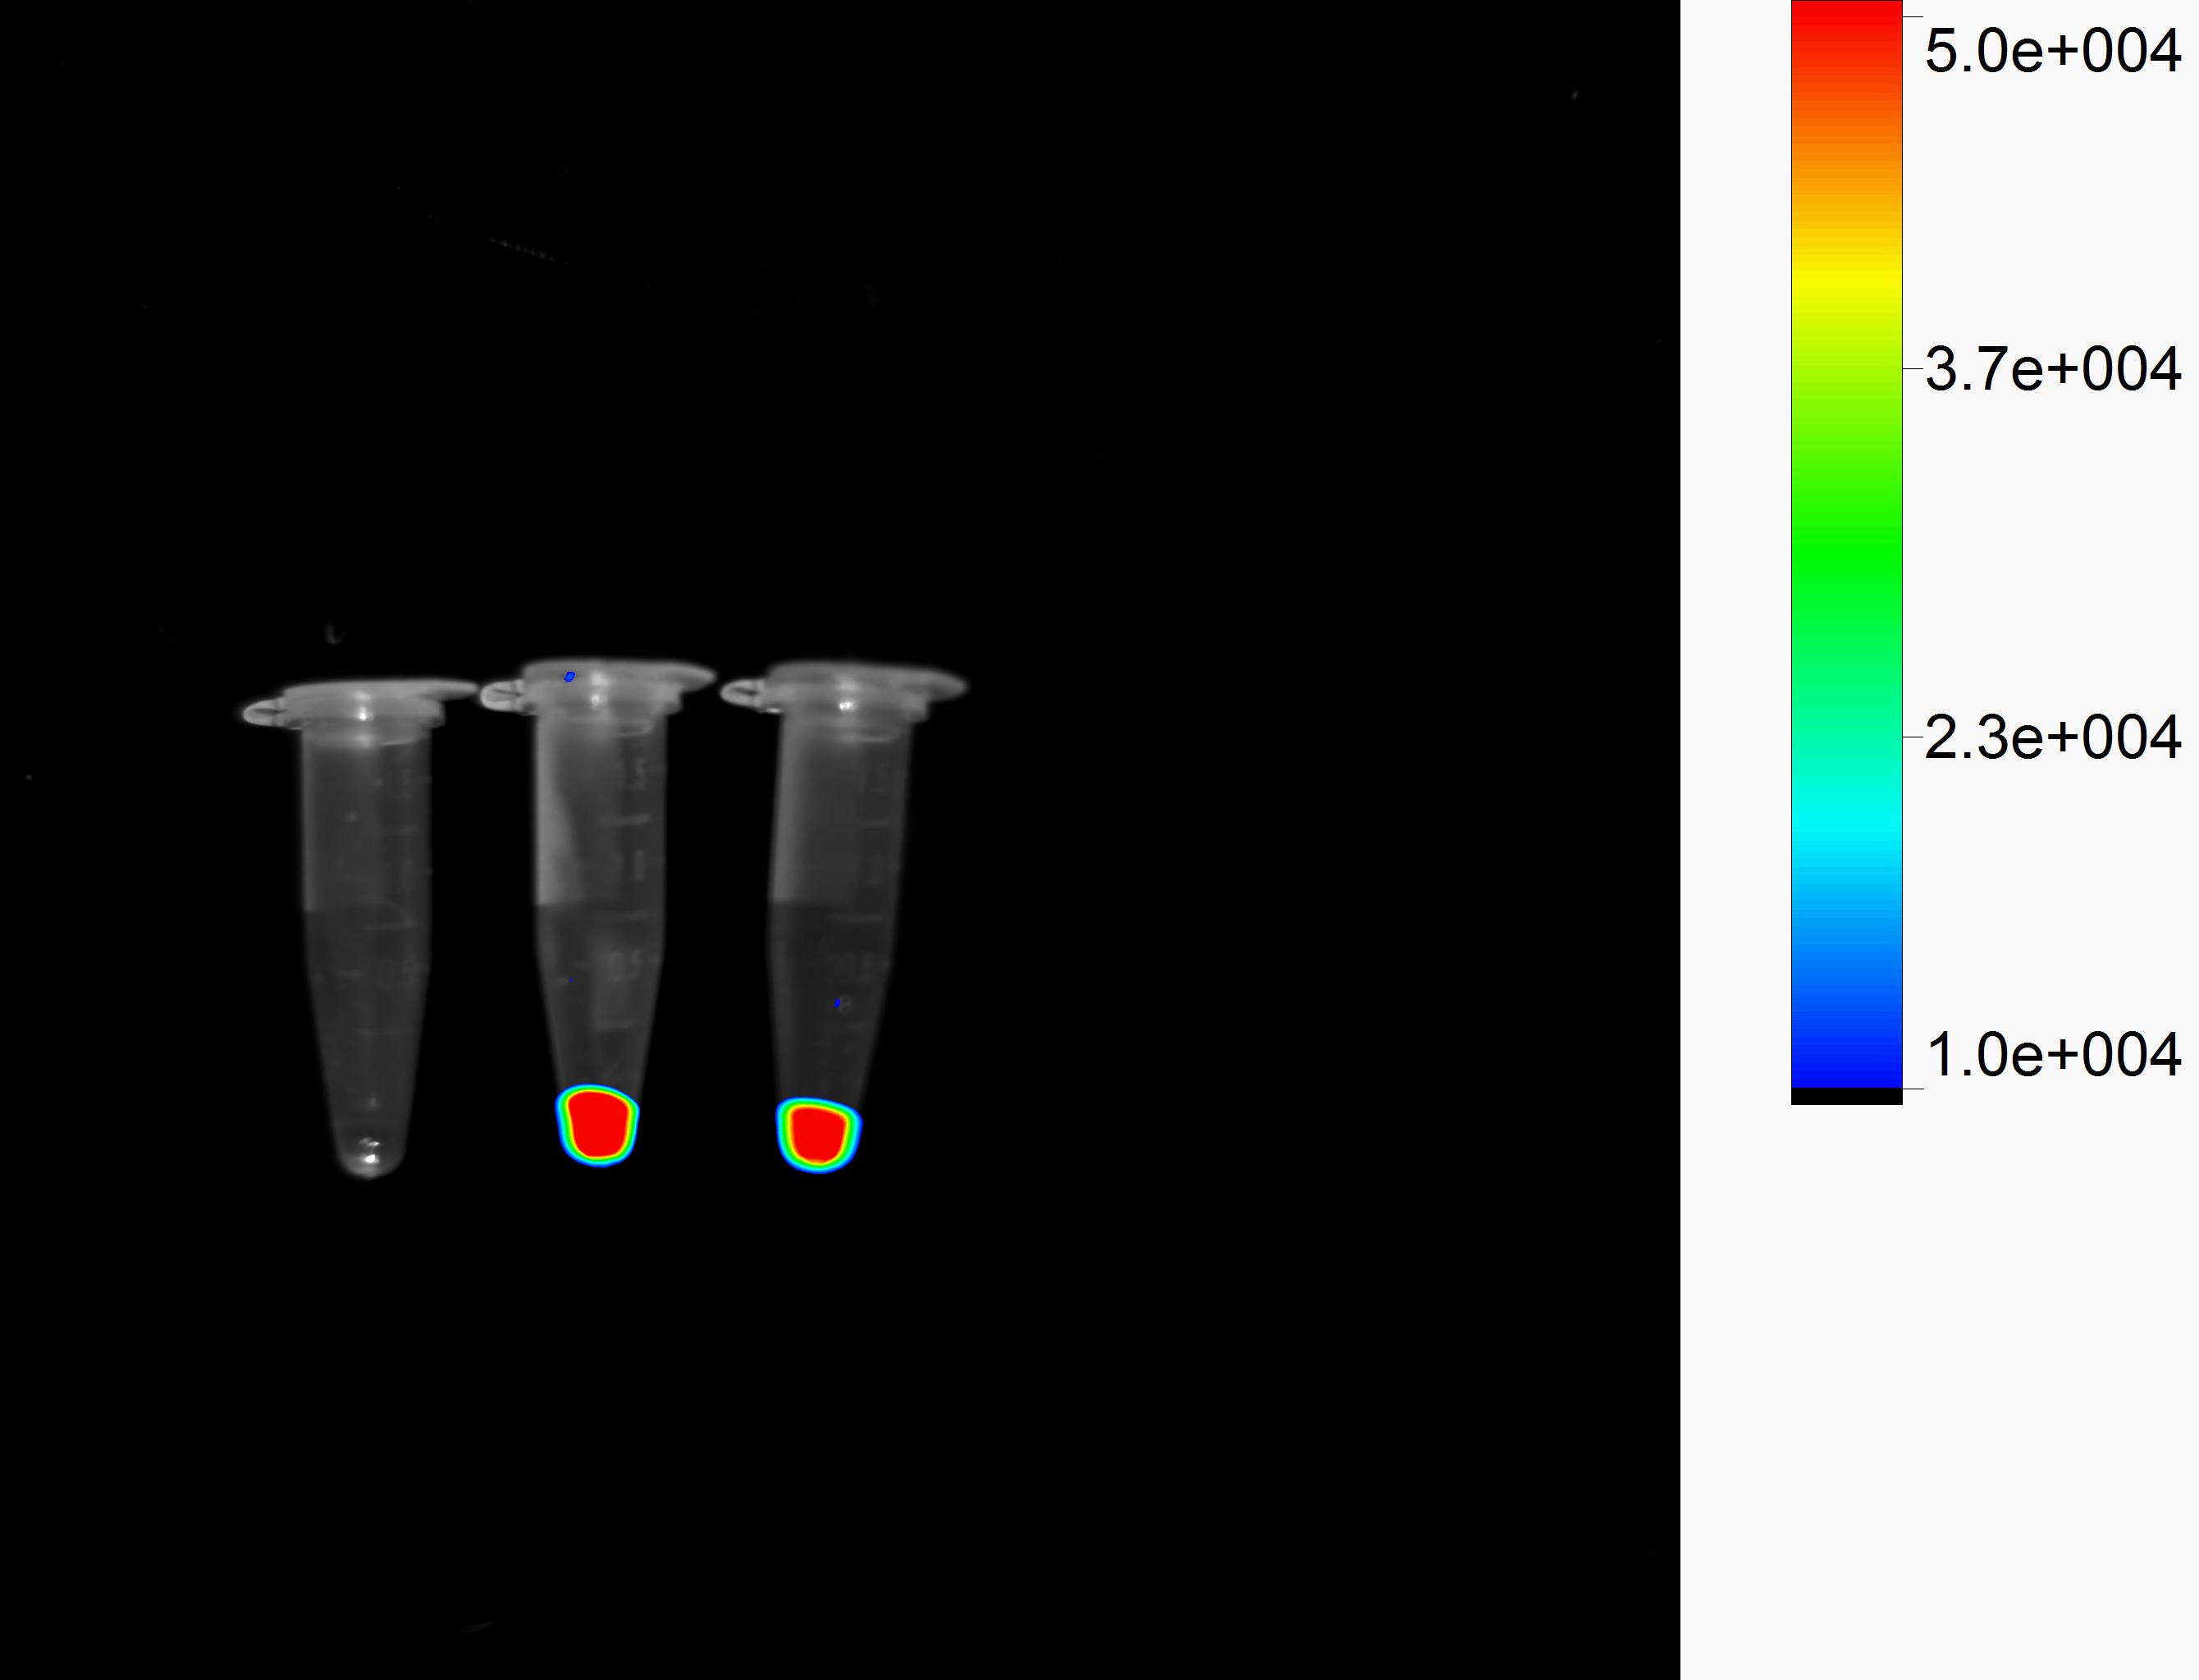


**Figure S8** Fluorescence images of PBS (left) and AuLA (middle) and AuLA-GSH (right).


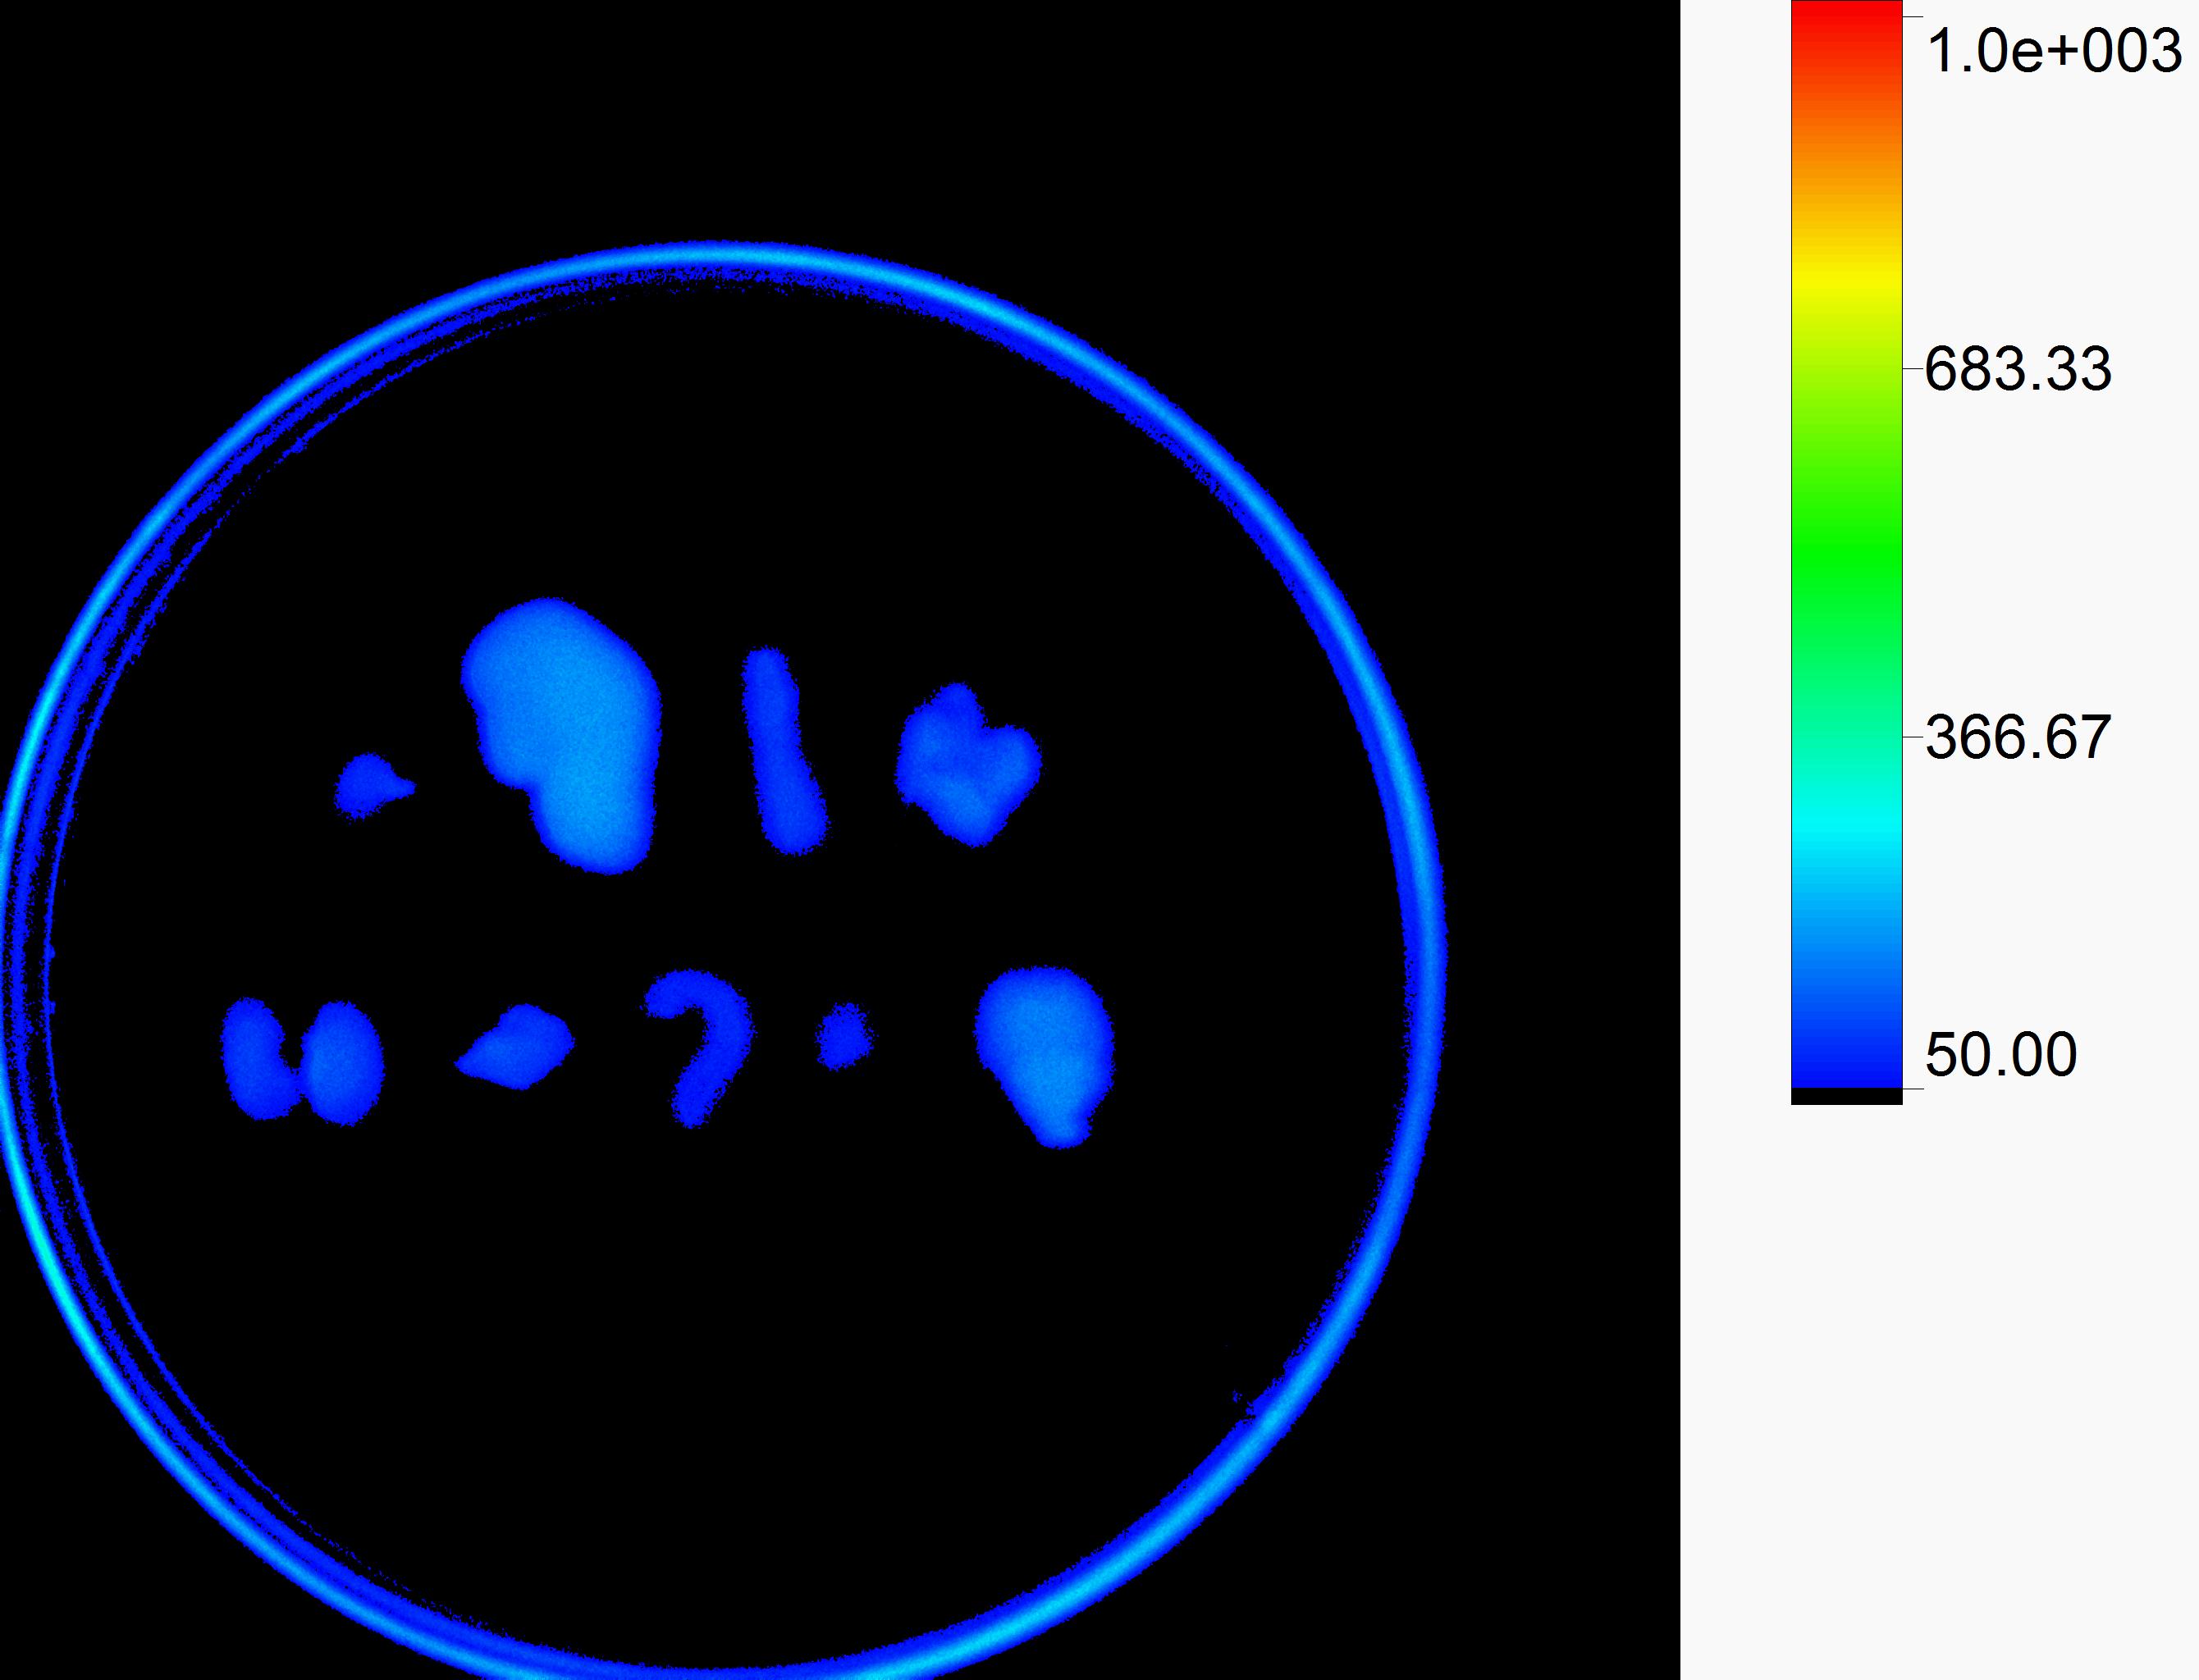


**Figure S9** Ex vivo fluorescence imaging of major organs (heart, liver, spleen, lung, kidneys, thymus, small intestine, muscle, brain) collected from mice injected with saline.


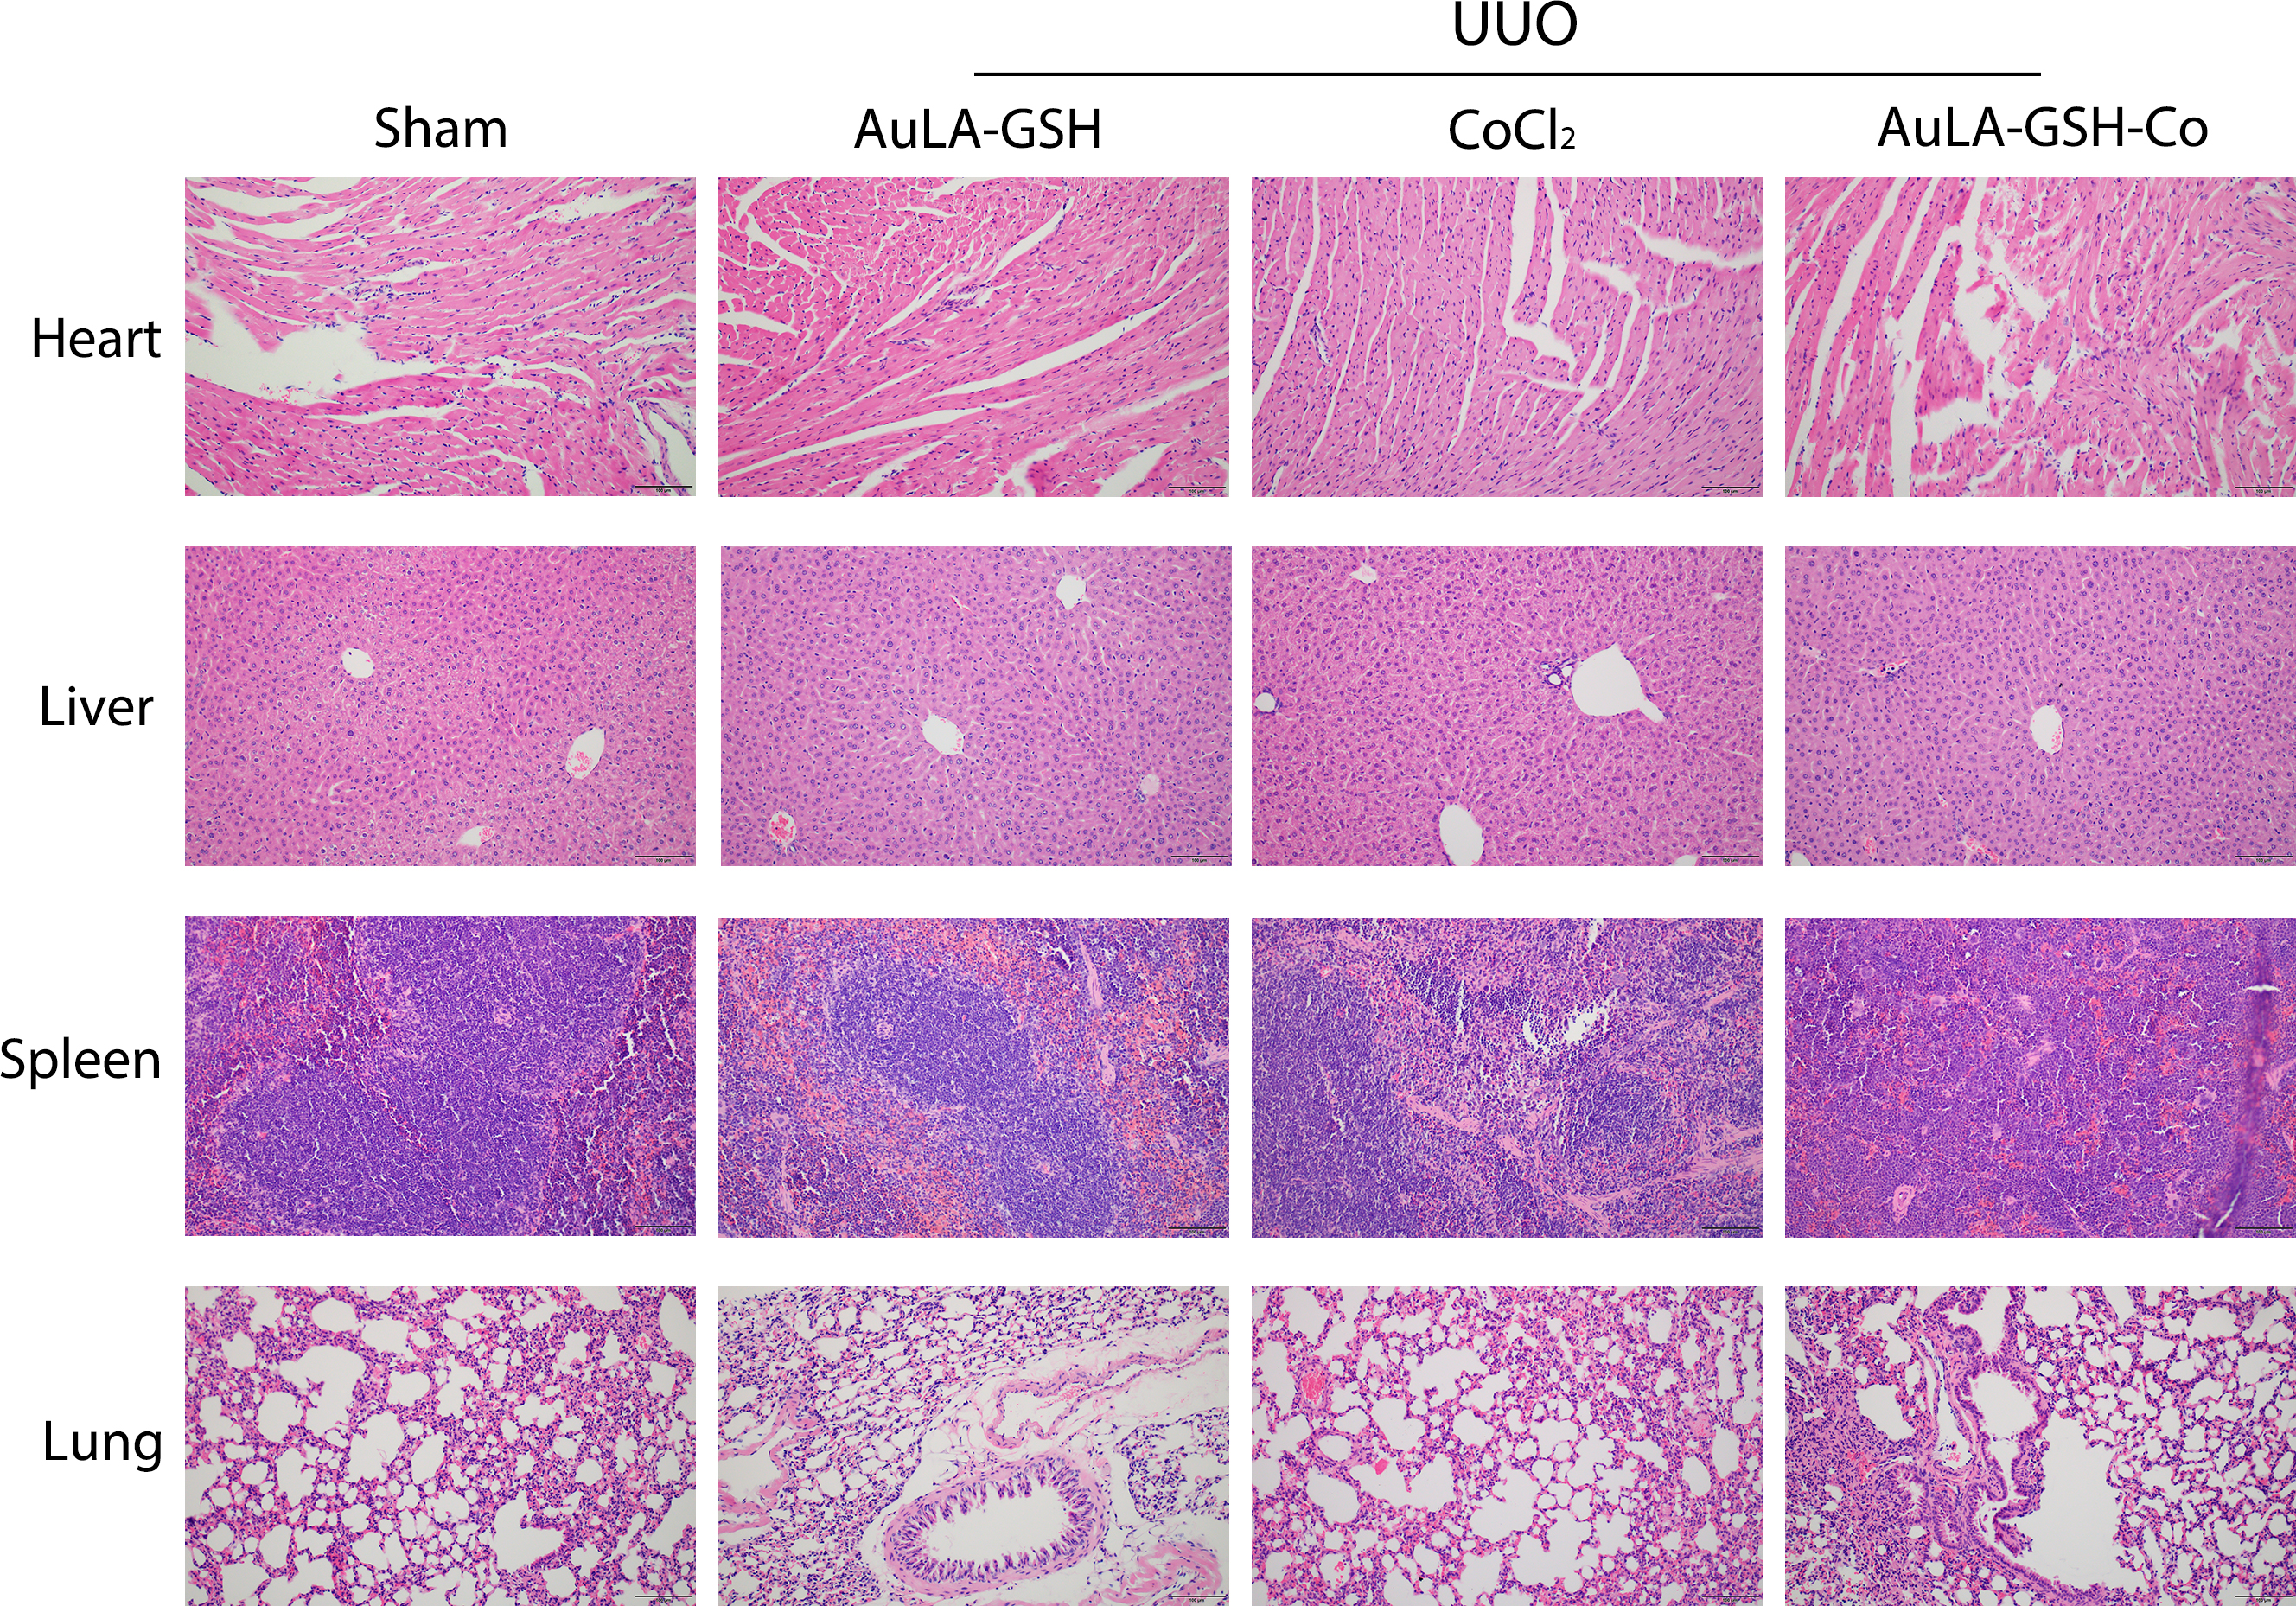


**Figure S10** Histological section images of major organs (heart, liver, spleen and lung) collected from mice receiving different treatments with H&E staining (200×).


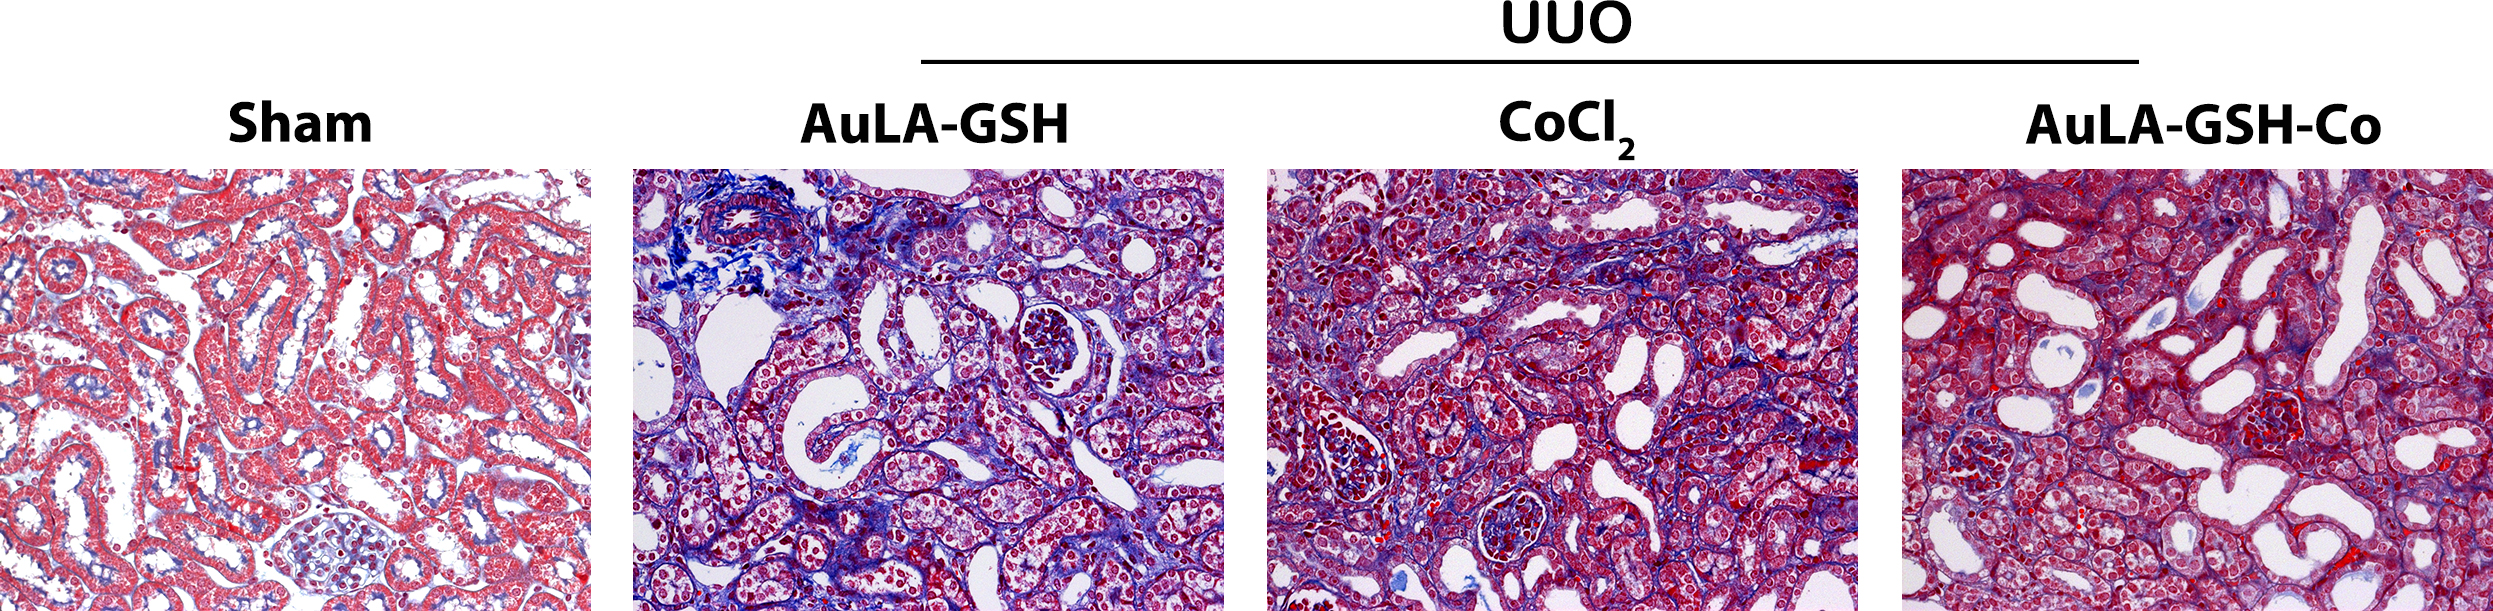


**Figure S11** Histological section images of kidneys collected from mice receiving different treatments with Masson staining (200×).
